# Supplementary material for: Direct synthesis of ethylene glycol from methanol by dielectric barrier discharge
Source: Royal Society of Chemistry journal article supplement (doi:10.1039/c3cc45877f), 2013-01-01
Supplement: c3cc45877f.pdf [file c3cc45877f.pdf]

### Supplementary Materials:

1. Optical emission spectroscopy (OES)
2. OES of H<sub>2</sub> and H<sub>2</sub>-CH<sub>3</sub>OH
3. The attribution of H<sub>2</sub> OES

## 1. Optical emission spectroscopy (OES)

OES (SP 2758, produced by Princeton instrument company) studies were carried out in the 200-1000 nm range. Light emitted from the plasma was collected and directed to a monochromator with a fiber optic cable. The accuracy of the position of the emission lines in the spectra was 0.1 nm.

The reaction conditions of H<sub>2</sub>-CH<sub>3</sub>OH discharge using double dielectric barrier discharge (DDBD) reactor in plasma diagnosis were as follows: H<sub>2</sub> = 0, 20, 40, 60, 80, 100 mL/min, CH<sub>3</sub>OH = 0.02 (liquid) mL/min, input power = 11 W.

The reaction conditions of H<sub>2</sub> discharge in plasma diagnosis were as follows: H<sub>2</sub> = 100 mL/min, input power = 11 W.

## 2. OES of H<sub>2</sub> and H<sub>2</sub>-CH<sub>3</sub>OH

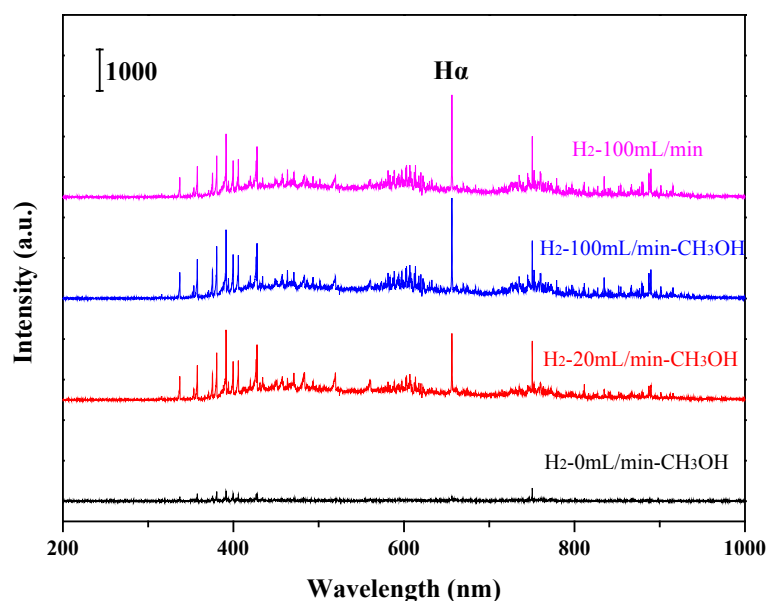

Fig. S1. OES (wavelength: 200~1000nm) of H<sub>2</sub> and H<sub>2</sub>-CH<sub>3</sub>OH non-equilibrium plasma in the double dielectric barrier discharge (DDBD) reactor with different H<sub>2</sub> content; (H<sub>2</sub> flow rate = 0, 20, 100 mL/min, CH<sub>3</sub>OH liquid flow rate = 0.02 mL/min, 1 atm, input power = 11 W, 300 G/mm grating, exposure time = 1.0 s.)

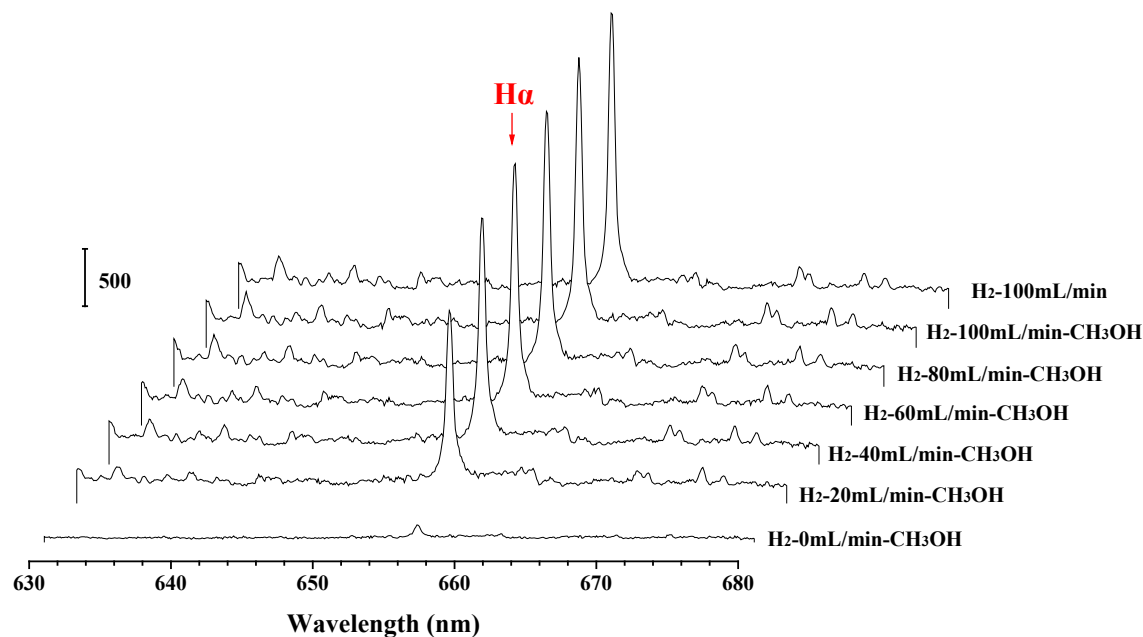

Fig. S2. OES (wavelength: 630~680nm) of H<sub>2</sub> and H<sub>2</sub>-CH<sub>3</sub>OH non-equilibrium plasma in the double dielectric barrier discharge (DDBD) reactor with different H<sub>2</sub> content; (H<sub>2</sub> flow rate = 0, 20, 40, 60, 80, 100 mL/min, CH<sub>3</sub>OH liquid flow rate = 0.02 mL/min, 1 atm, input power = 11 W, 300 G/mm grating, exposure time = 1.0 s.)

### 3. The attribution of H<sub>2</sub> OES

There are two important emission bands in the range of about 380-550 nm and about 580-650 nm, and an intensive emission line at 656.3 nm. These emissions correspond to the radiative dissociation continuum of the H<sub>2</sub> molecule ( $a^3\Sigma_g^+ \rightarrow b^3\Sigma_u^+$ ), the Fulcher transition of the H<sub>2</sub> molecule ( $d^3\Pi_u^+ \rightarrow a^3\Sigma_g^+$ ) and the H $\alpha$  line ( $3d^2D \rightarrow 2p^2P^0$ ), respectively [1]. The  $b^3\Sigma_u^+$  state of H<sub>2</sub> is a repulsive state which produces two ground state H atoms spontaneously. Thus the radiative dissociation continuum and the Fulcher transition constitute relay channels for ground state H formation [ $H_2 (a^3\Sigma_g^+) \rightarrow H_2 (b^3\Sigma_u^+) \rightarrow H (1S) + H (1S)$  and  $H_2 (d^3\Pi_u^+) \rightarrow H_2 (a^3\Sigma_g^+) \rightarrow H_2 (b^3\Sigma_u^+) \rightarrow H (1S) + H (1S)$ ].

[1]. U. Fantz, B. Schalk, K. Behringer, *New J. Phys.* **2000**, 2, 7.1.
